# Supplementary material for: Glycosylphosphatidylinositol Anchors from Galactomannan and GPI-Anchored Protein Are Synthesized by Distinct Pathways in Aspergillus fumigatus
Source: PubMed Central journal article supplement (PMC5872322; doi:10.3390/jof4010019), 2018-01-23
Supplement: jof-04-00019-s001.pdf [file jof-04-00019-s001.pdf]

# Glycosylphosphatidylinositol Anchors from Galactomannan and GPI-Anchored Protein Are Synthesized by Distinct Pathways in *Aspergillus fumigatus*

Jizhou Li <sup>1</sup>, Isabelle Mouyna <sup>1</sup>, Christine Henry <sup>1</sup>, Frédérique Moyrand <sup>2</sup>, Christian Malosse <sup>3</sup>, Julia Chamot-Rooke <sup>3</sup>, Guilhem Janbon <sup>2</sup>, Jean-Paul Latgé <sup>1</sup> and Thierry Fontaine <sup>1,\*</sup>

<sup>1</sup> Unité des Aspergillus, 25 rue du Docteur Roux, Institut Pasteur, 25 rue du Docteur Roux, 75015 Paris, France; lee19910503@gmail.com (J.L.); imouyna@pasteur.fr (I.M.); chenry@pasteur.fr (C.H.); jplatge@pasteur.fr (J.-P.L.); thierry.fontaine@pasteur.fr (T.F.)

<sup>2</sup> Unité de Biologie des ARN des Pathogènes Fongiques, Institut Pasteur, 25 rue du Docteur Roux, 75015 Paris, France; frederique.moyrand@pasteur.fr (F.M.); guilhem.janbon@pasteur.fr (G.J.)

<sup>3</sup> Unité de Spectrométrie de Masse pour la Biologie, Institut Pasteur, CNRS USR 2000, 28 rue du Docteur Roux, 75015 Paris, France; cmalosse@pasteur.fr (C.M.); julia.chamot-rooke@pasteur.fr (J.C.-R.)

\* Correspondence: thierry.fontaine@pasteur.fr; Tel.: +33-145-688-358

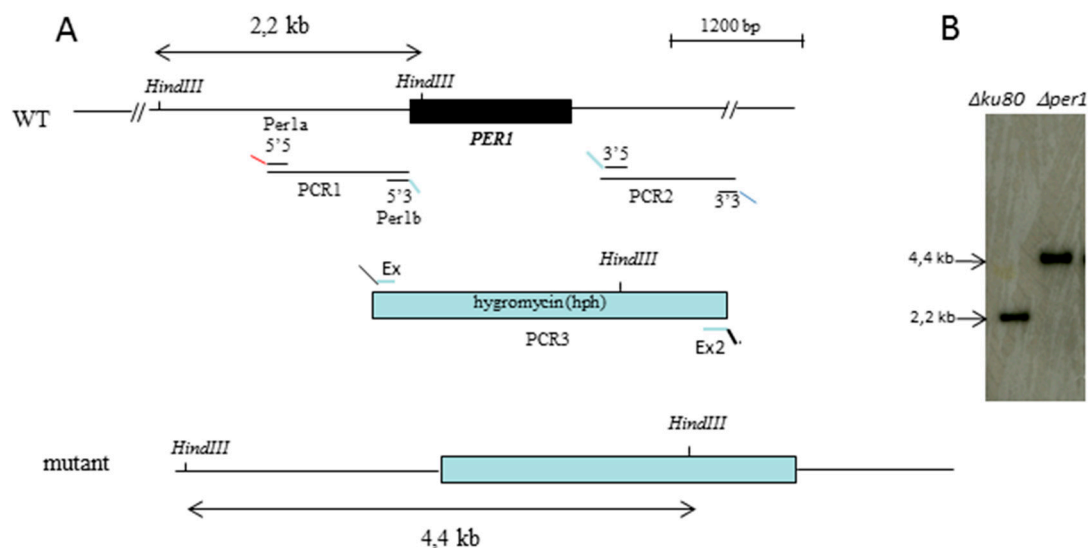

**Figure S1.** (A) Construction of  $\Delta per1$  mutant by PCR fusion. (B) Southern blot analysis: Genomic DNA has been digested by *HindIII* and hybridized with PCR1 probe amplified with primers Per1a-Per1b.

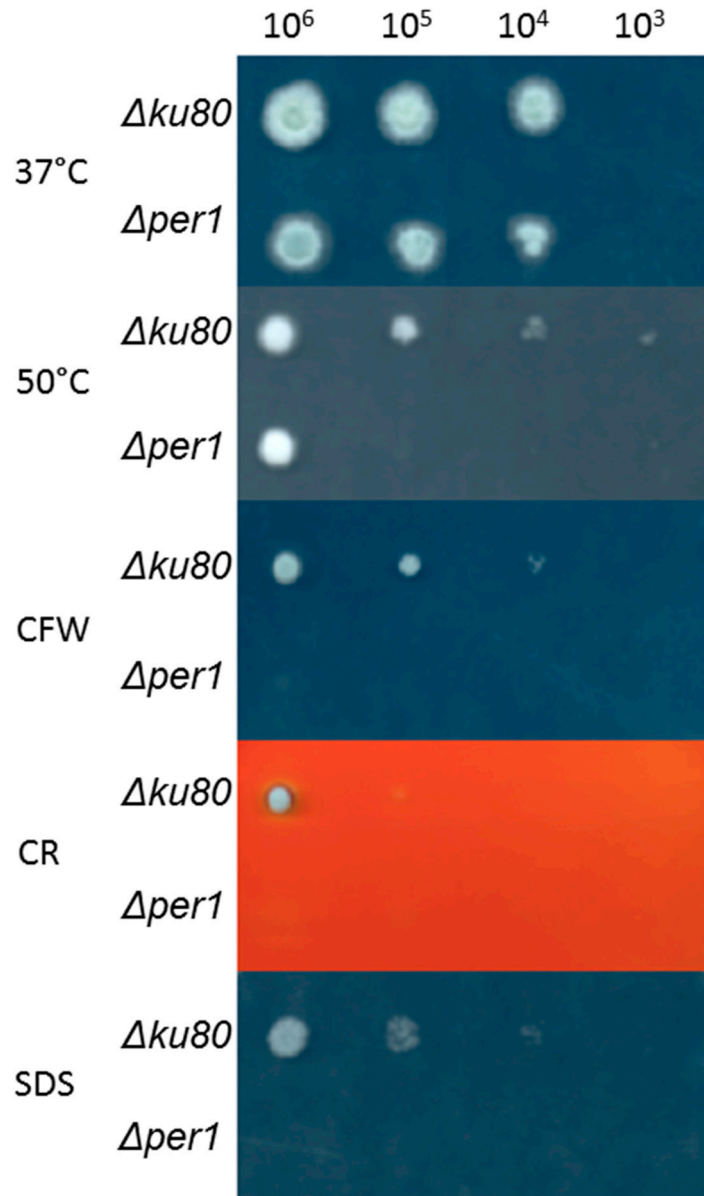

**Figure S2.** Growth of PER1 deletion mutant strain on solid minimum medium. Radial growth of the parental strain and PER1 deletion mutant strain on malt agar medium (48–72 h at 37 °C or 50 °C) with or without calcofluor white (CFW, 40 μg/mL), Congo red (CR, 50 μg/mL), SDS (0.01%).

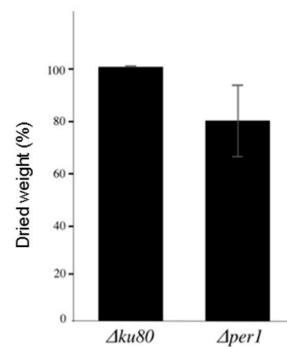

**Figure S3.** Growth of PER1 deletion mutant strain on Liquid Sabouraud medium. Growth was estimated as the measure of the dried weight of biomass.

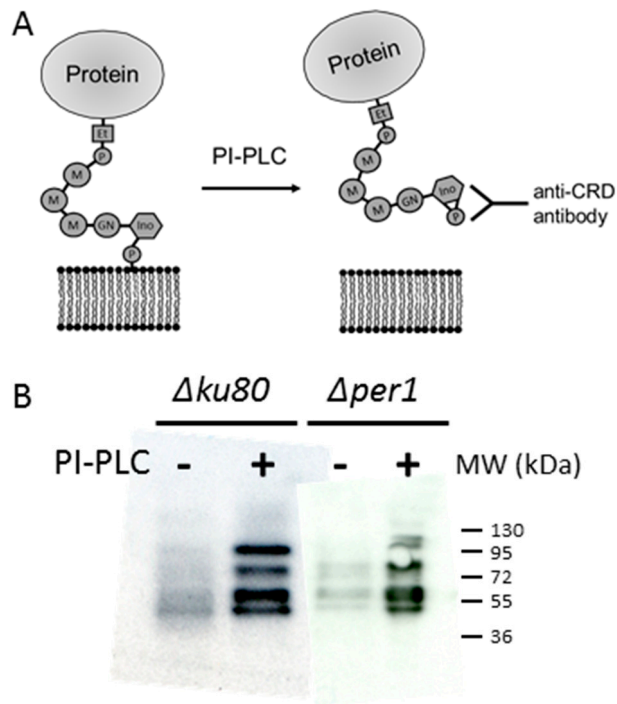

**Figure S4.** Detection of purified GPI-Aps. **(A)** Scheme of detection using a PI-phospholipase C and an anti-CRD antibody. **(B)** Western blot of GPI-APs fraction purified from parental ( $\Delta ku80$ ) and  $\Delta per1$  mutant strains.

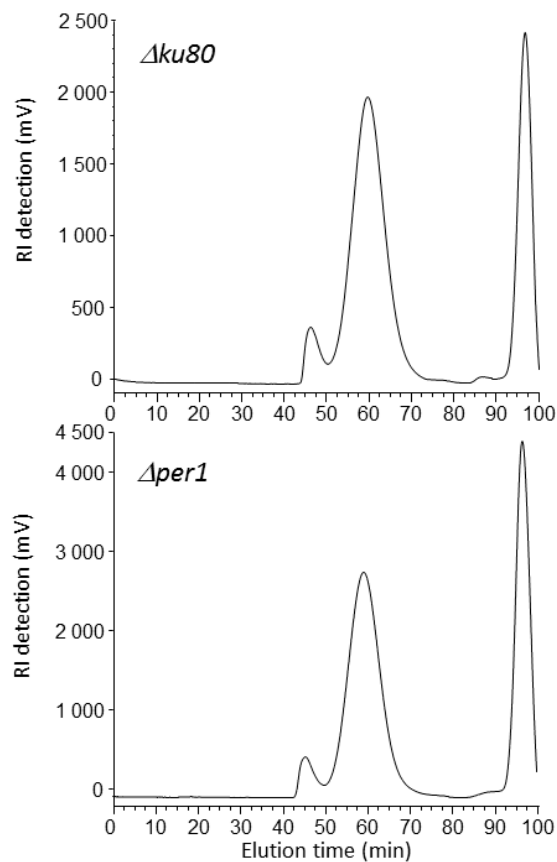

**Figure S5.** Gel filtration chromatography on Superdex 75 of purified LGM fraction from  $\Delta ku80$  and  $\Delta per1$  strains. Prior to the analysis, LGM was submitted to a nitrous deamination. Products were detected by a RI detector.

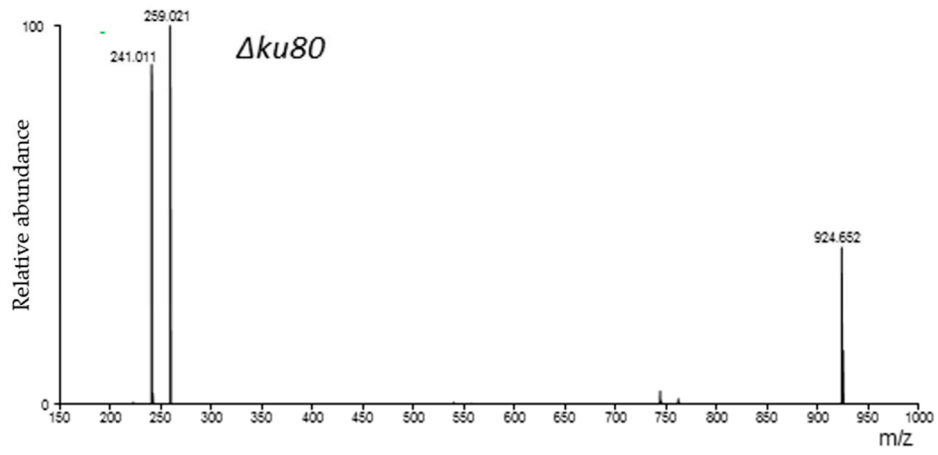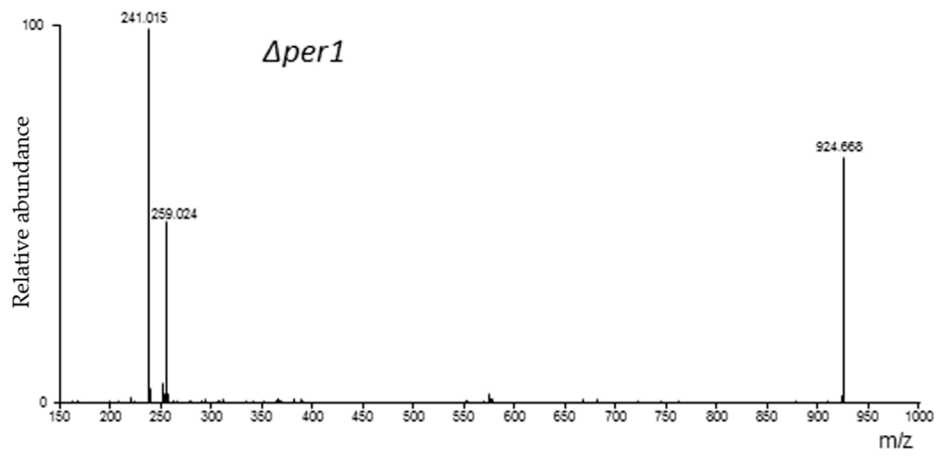

**Figure S6.** MS-MS spectra of the ion  $m/z$  924.650 of the lipid anchor of LGM isolated from the parental strain ( $\Delta ku80$ ) and from the mutant strain ( $\Delta per1$ ).

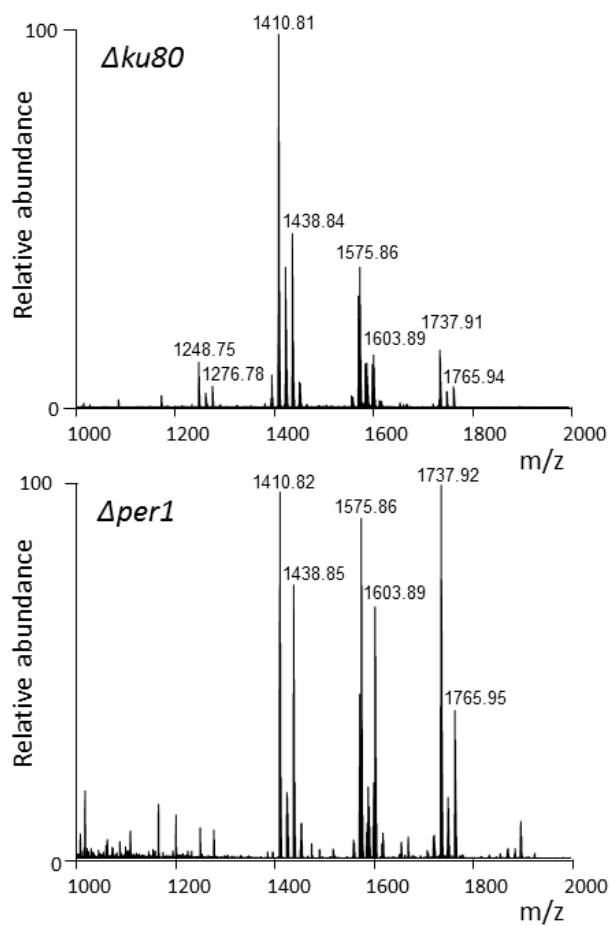

**Figure S7.** MS spectra of GIPC fraction isolated from parental ( $\Delta ku80$ ) and  $\Delta per1$  mutant strains. The MS data of GIPC fractions from  $\Delta ku80$  and  $\Delta per1$  were similar with the presence of characteristic ions [M-H]<sup>-</sup> at m/z 1410.8, 1572.8, 1575.9 and 1737.9 corresponding to the presence of 3 or 4 hexose residues with or without a choline-phosphate group linked to a IPC [38].

**Table S1.** Primers used in the paper.

| Name                                                              | Sequence                                                    |
|-------------------------------------------------------------------|-------------------------------------------------------------|
| Primers used to construct the <i>per1Δ::HYG</i> deletion cassette |                                                             |
| AFUB_006580-3'3                                                   | GCGGATAACAATTTACACACAGGAAACAGCGATTATGGCTCGCAGTGACC          |
| AFUB_006580-3'5                                                   | CTCCTTCAATATCATCTTCTGTCTCCAACACGCGTTCCCAGAATGATGTCTCAAGCCGC |
| AFUB_006580-5'5                                                   | GTAACGCCAGGGTTTTCCCAGTCACGACGCTCATGAATGCCTTAGCACGG          |
| AFUB_006580-5'3                                                   | ATCCACTTAACGTTACTGAAATCTCCTTACCATGGTGCTAATGGAGTGG           |
| AFUB_006580-Ex                                                    | ATCCACTTAACGTTACTGAAATCTCCTTACCATGGTGCTAATGGAGTGG           |
| AFUB_006580-Ex2                                                   | AACGAAGTGTCAGCATCGAGAG                                      |
| AFUB_006580-MKRr                                                  | GGAACGCGTGTGGAGACAGAAGATGATATTGAAGGAG                       |
| AFUB_006580-MKRf                                                  | GAAGGAGATTTAGTAACGTTAAGTGGAT                                |
| Primers used to construct the pNE478 plasmid                      |                                                             |
| GFPf                                                              | GAAGGAGATTTAGTAACGTTAAGTGGATATGGTGAGCAAGGGCGAGGA            |
| GFPPr                                                             | AGATCTGGATCCTTTACTTGTACAGCTCGTCC                            |
| HygF                                                              | AGATCTGTCCAATTGCTTCCGATCTGG                                 |
| HygR                                                              | GTTGGAGACAGAAGATGATATTGAAGGAGCGCGGCCGCGATGAATGTGTCTCTGTAGGC |
| Primers used to do the DIG probe                                  |                                                             |
| Per1a                                                             | CATGAATGCCTTAGCACGG                                         |
| Per1b                                                             | CACTCCATTAGCACCATG                                          |

**Table S2.** Global sugar composition of cell wall AI and AS fractions (%).

|                           | %              | %              |
|---------------------------|----------------|----------------|
| Alkali-insoluble fraction | <i>Δku80</i>   | <i>Δper1</i>   |
| Mannose                   | 12.16 +/- 2.19 | 7.1 +/- 1.01   |
| Glucose                   | 48.81 +/- 3.25 | 48.17 +/- 2.26 |
| Galactose                 | 10.96 +/- 1.6  | 8.52 +/- 0.92  |
| GlcNac                    | 27.71 +/- 1.2  | 36.2 +/- 4.17  |
| GalNAc                    | 0.35 +/- 0.07  | 0              |
| Alkali-soluble fraction   |                |                |
| Mannose                   | 3.41 +/- 1.21  | 3.44 +/- 1.59  |
| Glucose                   | 81.5 +/- 3.48  | 82.6 +/- 4.74  |
| Galactose                 | 9.3 +/- 1.93   | 7.91 +/- 3.77  |
| GlcNac                    | 0              | 0              |
| GalNAc                    | 5.8 +/- 1.14   | 6.05 +/- 0.64  |
